# Supplementary material for: Box Jellyfish (Cnidaria, Cubozoa) Extract Increases Neuron's Connection: A Possible Neuroprotector Effect
Source: PubMed Central journal article supplement (PMC7954621; doi:10.1155/2021/8855248), 2021-03-04
Supplement: 8855248.f1.pdf [file 8855248.f1.pdf]

| Compound          | Compound ID | Adducts  | Formula      | Score |
|-------------------|-------------|----------|--------------|-------|
| 31.82_510.1827m/z | HMDB0038329 | M+H      | C20H31NO14   | 37.6  |
| 31.82_510.1827m/z | HMDB0038329 | M+H      | C20H31NO14   | 37.6  |
| 31.82_510.1827m/z | HMDB0006592 | M+H-2H2O | C20H35NO16   | 37.5  |
| 31.82_510.1827m/z | HMDB0039750 | M+H-2H2O | C20H35NO16   | 37.5  |
| 31.82_510.1827m/z | HMDB0041622 | M+H-2H2O | C20H35NO16   | 37.5  |
| 31.82_510.1827m/z | HMDB0006592 | M+H-2H2O | C20H35NO16   | 37.5  |
| 31.82_510.1827m/z | HMDB0039750 | M+H-2H2O | C20H35NO16   | 37.5  |
| 31.82_510.1827m/z | HMDB0041622 | M+H-2H2O | C20H35NO16   | 37.5  |
| 7.83_437.0684m/z  | HMDB0128725 | M+Na     | C17H18O12    | 35.8  |
| 7.83_437.0684m/z  | HMDB0128726 | M+Na     | C17H18O12    | 35.8  |
| 7.83_437.0684m/z  | HMDB0128727 | M+Na     | C17H18O12    | 35.8  |
| 7.83_437.0684m/z  | HMDB0128728 | M+Na     | C17H18O12    | 35.8  |
| 7.83_437.0684m/z  | HMDB0128725 | M+Na     | C17H18O12    | 35.8  |
| 7.83_437.0684m/z  | HMDB0128726 | M+Na     | C17H18O12    | 35.8  |
| 7.83_437.0684m/z  | HMDB0128727 | M+Na     | C17H18O12    | 35.8  |
| 7.83_437.0684m/z  | HMDB0128728 | M+Na     | C17H18O12    | 35.8  |
| 7.83_437.0684m/z  | HMDB0000797 | M+H-H2O  | C13H19N4O12P | 35.6  |
| 7.83_437.0684m/z  | HMDB0000797 | M+H-H2O  | C13H19N4O12P | 35.6  |
| 42.79_643.2291m/z | HMDB0030112 | M+H-2H2O | C40H38O10    | 35.5  |
| 42.79_643.2291m/z | HMDB0035964 | M+H-2H2O | C40H38O10    | 35.5  |
| 42.79_643.2291m/z | HMDB0126375 | M+H-2H2O | C40H38O10    | 35.5  |
| 38.04_341.1982m/z | HMDB0015075 | M+H      | C21H26NO3+   | 35.5  |
| 38.04_341.1982m/z | HMDB0015591 | M+H      | C21H26NO3+   | 35.5  |
| 42.79_643.2291m/z | HMDB0030112 | M+H-2H2O | C40H38O10    | 35.5  |
| 42.79_643.2291m/z | HMDB0035964 | M+H-2H2O | C40H38O10    | 35.5  |
| 42.79_643.2291m/z | HMDB0126375 | M+H-2H2O | C40H38O10    | 35.5  |
| 38.04_341.1982m/z | HMDB0015075 | M+H      | C21H26NO3+   | 35.5  |
| 38.04_341.1982m/z | HMDB0015591 | M+H      | C21H26NO3+   | 35.5  |
| 39.00_615.2230m/z | HMDB0006607 | M+H-H2O  | C23H40N2O18  | 35.4  |
| 39.00_615.2230m/z | HMDB0041621 | M+H-H2O  | C23H40N2O18  | 35.4  |
| 39.00_615.2230m/z | HMDB0006607 | M+H-H2O  | C23H40N2O18  | 35.4  |
| 39.00_615.2230m/z | HMDB0041621 | M+H-H2O  | C23H40N2O18  | 35.4  |
| 38.04_341.1982m/z | HMDB0014876 | M+H      | C19H24N4O2   | 35.3  |
| 38.04_341.1982m/z | HMDB0014876 | M+H      | C19H24N4O2   | 35.3  |
| 38.04_341.1982m/z | HMDB0015121 | M+Na     | C19H28NO3+   | 34.6  |
| 38.04_341.1982m/z | HMDB0015121 | M+Na     | C19H28NO3+   | 34.6  |
| 2.33_118.0890m/z  | HMDB0000043 | M+H      | C5H11NO2     | 34.3  |
| 2.33_118.0890m/z  | HMDB0000883 | M+H      | C5H11NO2     | 34.3  |
| 2.33_118.0890m/z  | HMDB0001382 | M+H      | C5H11NO2     | 34.3  |
| 2.33_118.0890m/z  | HMDB0002141 | M+H      | C5H11NO2     | 34.3  |
| 2.33_118.0890m/z  | HMDB0003355 | M+H      | C5H11NO2     | 34.3  |
| 2.33_118.0890m/z  | HMDB0013716 | M+H      | C5H11NO2     | 34.3  |
| 2.33_118.0890m/z  | HMDB0015550 | M+H      | C5H11NO2     | 34.3  |
| 2.33_118.0890m/z  | HMDB0000043 | M+H      | C5H11NO2     | 34.3  |
| 2.33_118.0890m/z  | HMDB0000883 | M+H      | C5H11NO2     | 34.3  |
| 2.33_118.0890m/z  | HMDB0001382 | M+H      | C5H11NO2     | 34.3  |
| 28.39_482.1733m/z | HMDB0001396 | M+Na     | C20H25N7O6   | 34.2  |
| 31.82_510.1827m/z | HMDB0014832 | M+H-H2O  | C27H29NO10   | 34.2  |

|                   |             |          |               |      |
|-------------------|-------------|----------|---------------|------|
| 31.82_510.1827m/z | HMDB0041884 | M+H-2H2O | C27H31NO11    | 34.2 |
| 31.82_510.1827m/z | HMDB0060823 | M+H-2H2O | C27H31NO11    | 34.2 |
| 39.04_490.2726m/z | HMDB0011496 | M+H-2H2O | C27H44NO7P    | 34.1 |
| 39.04_490.2726m/z | HMDB0011526 | M+H-2H2O | C27H44NO7P    | 34.1 |
| 39.04_490.2726m/z | HMDB0011496 | M+H-2H2O | C27H44NO7P    | 34.1 |
| 39.04_490.2726m/z | HMDB0011526 | M+H-2H2O | C27H44NO7P    | 34.1 |
| 42.79_643.2291m/z | HMDB0130483 | M+H-2H2O | C36H38O13     | 33.8 |
| 42.79_643.2291m/z | HMDB0130484 | M+H-2H2O | C36H38O13     | 33.8 |
| 42.79_643.2291m/z | HMDB0130485 | M+H-2H2O | C36H38O13     | 33.8 |
| 27.53_496.1463m/z | HMDB0029776 | M+Na     | C20H27NO12    | 33.8 |
| 42.79_643.2291m/z | HMDB0130483 | M+H-2H2O | C36H38O13     | 33.8 |
| 42.79_643.2291m/z | HMDB0130484 | M+H-2H2O | C36H38O13     | 33.8 |
| 42.79_643.2291m/z | HMDB0130485 | M+H-2H2O | C36H38O13     | 33.8 |
| 27.53_496.1463m/z | HMDB0029776 | M+Na     | C20H27NO12    | 33.8 |
| 31.82_510.1827m/z | HMDB0132953 | M+H-H2O  | C23H33N3O9S   | 33.6 |
| 31.82_510.1827m/z | HMDB0132954 | M+H-H2O  | C23H33N3O9S   | 33.6 |
| 31.82_510.1827m/z | HMDB0132953 | M+H-H2O  | C23H33N3O9S   | 33.6 |
| 31.82_510.1827m/z | HMDB0132954 | M+H-H2O  | C23H33N3O9S   | 33.6 |
| 28.39_482.1733m/z | HMDB0015230 | M+H      | C22H28FN3O6S  | 33.5 |
| 38.04_341.1982m/z | HMDB0029850 | M+Na     | C16H30O6      | 33.5 |
| 38.04_341.1982m/z | HMDB0032368 | M+Na     | C16H30O6      | 33.5 |
| 43.72_752.1608m/z | HMDB0001197 | M+H-2H2O | C27H35N9O15P2 | 33.3 |
| 40.74_629.2282m/z | HMDB0032114 | M+H-H2O  | C38H34N2O8    | 32.9 |
| 38.94_615.2186m/z | HMDB0006607 | M+H-H2O  | C23H40N2O18   | 32.8 |
| 38.94_615.2186m/z | HMDB0041621 | M+H-H2O  | C23H40N2O18   | 32.8 |
| 44.45_779.1615m/z | HMDB0126885 | M+Na     | C32H36O21     | 32.6 |
| 44.45_779.1615m/z | HMDB0126886 | M+Na     | C32H36O21     | 32.6 |
| 44.45_779.1615m/z | HMDB0126887 | M+Na     | C32H36O21     | 32.6 |
| 44.45_779.1615m/z | HMDB0126888 | M+Na     | C32H36O21     | 32.6 |
| 44.45_779.1615m/z | HMDB0127450 | M+Na     | C32H36O21     | 32.6 |
| 44.45_779.1615m/z | HMDB0127451 | M+Na     | C32H36O21     | 32.6 |
| 44.45_779.1615m/z | HMDB0126885 | M+Na     | C32H36O21     | 32.6 |
| 44.45_779.1615m/z | HMDB0126886 | M+Na     | C32H36O21     | 32.6 |
| 44.45_779.1615m/z | HMDB0126887 | M+Na     | C32H36O21     | 32.6 |
| 44.45_779.1615m/z | HMDB0126888 | M+Na     | C32H36O21     | 32.6 |
| 44.45_779.1615m/z | HMDB0127450 | M+Na     | C32H36O21     | 32.6 |
| 44.45_779.1615m/z | HMDB0127451 | M+Na     | C32H36O21     | 32.6 |
| 44.45_779.1615m/z | HMDB0127452 | M+Na     | C32H36O21     | 32.6 |
| 7.83_437.0684m/z  | HMDB0060316 | M+Na     | C16H18N2O9S   | 32.5 |
| 39.04_615.2607m/z | HMDB0129666 | M+H-2H2O | C36H42O11     | 32.5 |
| 39.04_615.2607m/z | HMDB0129667 | M+H-2H2O | C36H42O11     | 32.5 |
| 39.04_615.2607m/z | HMDB0129668 | M+H-2H2O | C36H42O11     | 32.5 |
| 7.83_437.0684m/z  | HMDB0060316 | M+Na     | C16H18N2O9S   | 32.5 |
| 39.04_615.2607m/z | HMDB0129666 | M+H-2H2O | C36H42O11     | 32.5 |
| 39.04_615.2607m/z | HMDB0129667 | M+H-2H2O | C36H42O11     | 32.5 |
| 39.04_615.2607m/z | HMDB0129668 | M+H-2H2O | C36H42O11     | 32.5 |
| 35.38_538.2029m/z | HMDB0006595 | M+Na     | C20H37NO14    | 32.4 |
| 40.66_629.2270m/z | HMDB0032114 | M+H-H2O  | C38H34N2O8    | 32.4 |
| 40.66_629.2270m/z | HMDB0034634 | M+H-H2O  | C32H38O14     | 32.2 |
| 43.72_752.1608m/z | HMDB0125188 | M+H-2H2O | C36H35O20+    | 32.1 |

|                   |             |          |              |      |
|-------------------|-------------|----------|--------------|------|
| 43.72_752.1608m/z | HMDB0125189 | M+H-2H2O | C36H35O20+   | 32.1 |
| 43.72_752.1608m/z | HMDB0125190 | M+H-2H2O | C36H35O20+   | 32.1 |
| 43.72_752.1608m/z | HMDB0125191 | M+H-2H2O | C36H35O20+   | 32.1 |
| 43.72_752.1608m/z | HMDB0125192 | M+H-2H2O | C36H35O20+   | 32.1 |
| 43.72_752.1608m/z | HMDB0125193 | M+H-2H2O | C36H35O20+   | 32.1 |
| 43.72_752.1608m/z | HMDB0125188 | M+H-2H2O | C36H35O20+   | 32.1 |
| 43.72_752.1608m/z | HMDB0125189 | M+H-2H2O | C36H35O20+   | 32.1 |
| 43.72_752.1608m/z | HMDB0125190 | M+H-2H2O | C36H35O20+   | 32.1 |
| 43.72_752.1608m/z | HMDB0125191 | M+H-2H2O | C36H35O20+   | 32.1 |
| 43.72_752.1608m/z | HMDB0125192 | M+H-2H2O | C36H35O20+   | 32.1 |
| 43.72_752.1608m/z | HMDB0125193 | M+H-2H2O | C36H35O20+   | 32.1 |
| 40.74_629.2282m/z | HMDB0034634 | M+H-H2O  | C32H38O14    | 31.8 |
| 38.04_341.1982m/z | HMDB0014469 | M+H-2H2O | C22H29FO4    | 31.8 |
| 38.04_341.1982m/z | HMDB0014687 | M+H-2H2O | C22H29FO4    | 31.8 |
| 0.29_156.0199m/z  | HMDB0033843 | M+H-H2O  | C6H9NOP2     | 31.8 |
| 40.74_629.2282m/z | HMDB0034634 | M+H-H2O  | C32H38O14    | 31.8 |
| 44.45_779.1615m/z | HMDB0041730 | M+H-H2O  | C34H36O22    | 31.7 |
| 27.53_496.1463m/z | HMDB0000972 | M+Na     | C20H23N7O7   | 31.7 |
| 27.53_496.1463m/z | HMDB0001562 | M+Na     | C20H23N7O7   | 31.7 |
| 27.53_496.1463m/z | HMDB0002140 | M+Na     | C20H23N7O7   | 31.7 |
| 27.53_496.1463m/z | HMDB0062757 | M+Na     | C20H23N7O7   | 31.7 |
| 44.45_779.1615m/z | HMDB0037373 | M+Na     | C39H32O16    | 31.6 |
| 27.53_496.1463m/z | HMDB0128696 | M+H-2H2O | C21H29N3O11S | 31.5 |
| 38.98_616.2241m/z | HMDB0060139 | M+Na     | C28H39N3O9S  | 31.4 |
| 38.04_341.1982m/z | HMDB0060574 | M+H      | C17H28N2O5   | 31.4 |
| 27.53_496.1463m/z | HMDB0031112 | M+H-2H2O | C29H25NO9    | 31.4 |
| 27.53_496.1463m/z | HMDB0034788 | M+H-2H2O | C29H25NO9    | 31.4 |
| 27.53_496.1463m/z | HMDB0040769 | M+H-H2O  | C29H23NO8    | 31.3 |
| 27.53_496.1463m/z | HMDB0040769 | M+H-H2O  | C29H23NO8    | 31.3 |
| 39.28_566.2113m/z | HMDB0040387 | M+H      | C34H31NO7    | 31.2 |
| 0.29_156.0199m/z  | HMDB0000191 | M+Na     | C4H7NO4      | 31.2 |
| 0.29_156.0199m/z  | HMDB0006483 | M+Na     | C4H7NO4      | 31.2 |
| 0.29_156.0199m/z  | HMDB0011753 | M+Na     | C4H7NO4      | 31.2 |
| 0.29_156.0199m/z  | HMDB0062186 | M+Na     | C4H7NO4      | 31.2 |
| 0.29_156.0199m/z  | HMDB0062501 | M+Na     | C4H7NO4      | 31.2 |
| 39.28_566.2113m/z | HMDB0040387 | M+H      | C34H31NO7    | 31.2 |
| 28.39_482.1733m/z | HMDB0015481 | M+H      | C27H23N5O4   | 30.8 |
| 0.28_140.0572m/z  | HMDB0000197 | M+H-2H2O | C10H9NO2     | 30.8 |
| 0.28_140.0572m/z  | HMDB0004073 | M+H-2H2O | C10H9NO2     | 30.8 |
| 0.28_140.0572m/z  | HMDB0038628 | M+H-2H2O | C10H9NO2     | 30.8 |
| 0.28_140.0572m/z  | HMDB0040972 | M+H-2H2O | C10H9NO2     | 30.8 |
| 28.39_482.1733m/z | HMDB0015481 | M+H      | C27H23N5O4   | 30.8 |
| 0.28_140.0572m/z  | HMDB0000197 | M+H-2H2O | C10H9NO2     | 30.8 |
| 0.28_140.0572m/z  | HMDB0004073 | M+H-2H2O | C10H9NO2     | 30.8 |
| 0.28_140.0572m/z  | HMDB0038628 | M+H-2H2O | C10H9NO2     | 30.8 |
| 0.28_140.0572m/z  | HMDB0040972 | M+H-2H2O | C10H9NO2     | 30.8 |
| 35.38_538.2029m/z | HMDB0034773 | M+H      | C25H31NO12   | 30.7 |
| 35.38_538.2029m/z | HMDB0034774 | M+H      | C25H31NO12   | 30.7 |
| 43.01_643.2387m/z | HMDB0030112 | M+H-2H2O | C40H38O10    | 30.7 |
| 43.01_643.2387m/z | HMDB0035964 | M+H-2H2O | C40H38O10    | 30.7 |

|                   |             |          |             |      |
|-------------------|-------------|----------|-------------|------|
| 43.01_643.2387m/z | HMDB0126375 | M+H-2H2O | C40H38O10   | 30.7 |
| 27.53_496.1463m/z | HMDB0134078 | M+Na     | C19H27N3O9S | 30.7 |
| 35.38_538.2029m/z | HMDB0034773 | M+H      | C25H31NO12  | 30.7 |
| 35.38_538.2029m/z | HMDB0034774 | M+H      | C25H31NO12  | 30.7 |
| 43.01_643.2387m/z | HMDB0030112 | M+H-2H2O | C40H38O10   | 30.7 |
| 43.01_643.2387m/z | HMDB0035964 | M+H-2H2O | C40H38O10   | 30.7 |
| 43.01_643.2387m/z | HMDB0126375 | M+H-2H2O | C40H38O10   | 30.7 |
| 27.53_496.1463m/z | HMDB0134078 | M+Na     | C19H27N3O9S | 30.7 |
| 38.73_615.2183m/z | HMDB0030627 | M+H-2H2O | C31H38O15   | 30.3 |
| 38.73_615.2183m/z | HMDB0034281 | M+H-2H2O | C31H38O15   | 30.3 |
| 39.28_566.2113m/z | HMDB0135503 | M+H      | C27H35NO12  | 30.3 |
| 39.28_566.2113m/z | HMDB0135505 | M+H      | C27H35NO12  | 30.3 |
| 39.28_566.2113m/z | HMDB0135507 | M+H      | C27H35NO12  | 30.3 |
| 42.79_643.2291m/z | HMDB0041431 | M+H      | C38H34N4O6  | 30.3 |
| 0.28_140.0572m/z  | HMDB0062189 | M+H-H2O  | C10H7NO     | 30.3 |
| 38.73_615.2183m/z | HMDB0030627 | M+H-2H2O | C31H38O15   | 30.3 |
| 38.73_615.2183m/z | HMDB0034281 | M+H-2H2O | C31H38O15   | 30.3 |
| 39.28_566.2113m/z | HMDB0135503 | M+H      | C27H35NO12  | 30.3 |
| 39.28_566.2113m/z | HMDB0135505 | M+H      | C27H35NO12  | 30.3 |
| 39.28_566.2113m/z | HMDB0135507 | M+H      | C27H35NO12  | 30.3 |
| 42.79_643.2291m/z | HMDB0041431 | M+H      | C38H34N4O6  | 30.3 |
| 0.28_140.0572m/z  | HMDB0062189 | M+H-H2O  | C10H7NO     | 30.3 |
| 38.73_615.2183m/z | HMDB0129415 | M+H      | C31H34O13   | 30.2 |
| 38.73_615.2183m/z | HMDB0129416 | M+H      | C31H34O13   | 30.2 |
| 38.73_615.2183m/z | HMDB0129417 | M+H      | C31H34O13   | 30.2 |
| 38.73_615.2183m/z | HMDB0132767 | M+H      | C31H34O13   | 30.2 |
| 38.73_615.2183m/z | HMDB0132768 | M+H      | C31H34O13   | 30.2 |
| 38.73_615.2183m/z | HMDB0132770 | M+H      | C31H34O13   | 30.2 |
| 38.73_615.2183m/z | HMDB0132771 | M+H      | C31H34O13   | 30.2 |
| 38.73_615.2183m/z | HMDB0132772 | M+H      | C31H34O13   | 30.2 |
| 38.73_615.2183m/z | HMDB0132774 | M+H      | C31H34O13   | 30.2 |
| 38.73_615.2183m/z | HMDB0132775 | M+H      | C31H34O13   | 30.2 |
| 38.73_615.2183m/z | HMDB0132776 | M+H      | C31H34O13   | 30.2 |
| 38.73_615.2183m/z | HMDB0132777 | M+H      | C31H34O13   | 30.2 |
| 38.73_615.2183m/z | HMDB0132778 | M+H      | C31H34O13   | 30.2 |
| 38.73_615.2183m/z | HMDB0132779 | M+H      | C31H34O13   | 30.2 |
| 38.73_615.2183m/z | HMDB0132780 | M+H      | C31H34O13   | 30.2 |
| 38.73_615.2183m/z | HMDB0132782 | M+H      | C31H34O13   | 30.2 |
| 38.73_615.2183m/z | HMDB0132783 | M+H      | C31H34O13   | 30.2 |
| 38.73_615.2183m/z | HMDB0132784 | M+H      | C31H34O13   | 30.2 |
| 38.73_615.2183m/z | HMDB0132786 | M+H      | C31H34O13   | 30.2 |
| 38.73_615.2183m/z | HMDB0132787 | M+H      | C31H34O13   | 30.2 |
| 38.73_615.2183m/z | HMDB0132788 | M+H      | C31H34O13   | 30.2 |
| 38.73_615.2183m/z | HMDB0132789 | M+H      | C31H34O13   | 30.2 |
| 38.73_615.2183m/z | HMDB0132791 | M+H      | C31H34O13   | 30.2 |
| 38.73_615.2183m/z | HMDB0132792 | M+H      | C31H34O13   | 30.2 |
| 38.73_615.2183m/z | HMDB0132793 | M+H      | C31H34O13   | 30.2 |
| 38.73_615.2183m/z | HMDB0132811 | M+H      | C31H34O13   | 30.2 |
| 38.73_615.2183m/z | HMDB0132812 | M+H      | C31H34O13   | 30.2 |
| 38.73_615.2183m/z | HMDB0132813 | M+H      | C31H34O13   | 30.2 |

|                   |             |          |            |      |
|-------------------|-------------|----------|------------|------|
| 38.73_615.2183m/z | HMDB0132815 | M+H      | C31H34O13  | 30.2 |
| 38.73_615.2183m/z | HMDB0132816 | M+H      | C31H34O13  | 30.2 |
| 38.73_615.2183m/z | HMDB0132817 | M+H      | C31H34O13  | 30.2 |
| 38.73_615.2183m/z | HMDB0132819 | M+H      | C31H34O13  | 30.2 |
| 38.73_615.2183m/z | HMDB0132820 | M+H      | C31H34O13  | 30.2 |
| 38.73_615.2183m/z | HMDB0132821 | M+H      | C31H34O13  | 30.2 |
| 38.73_615.2183m/z | HMDB0132822 | M+H      | C31H34O13  | 30.2 |
| 38.73_615.2183m/z | HMDB0132823 | M+H      | C31H34O13  | 30.2 |
| 38.73_615.2183m/z | HMDB0132824 | M+H      | C31H34O13  | 30.2 |
| 38.73_615.2183m/z | HMDB0132825 | M+H      | C31H34O13  | 30.2 |
| 38.73_615.2183m/z | HMDB0132828 | M+H      | C31H34O13  | 30.2 |
| 38.73_615.2183m/z | HMDB0132831 | M+H      | C31H34O13  | 30.2 |
| 38.73_615.2183m/z | HMDB0132832 | M+H      | C31H34O13  | 30.2 |
| 38.73_615.2183m/z | HMDB0132833 | M+H      | C31H34O13  | 30.2 |
| 38.73_615.2183m/z | HMDB0132835 | M+H      | C31H34O13  | 30.2 |
| 38.73_615.2183m/z | HMDB0132836 | M+H      | C31H34O13  | 30.2 |
| 38.73_615.2183m/z | HMDB0132837 | M+H      | C31H34O13  | 30.2 |
| 38.73_615.2183m/z | HMDB0132838 | M+H      | C31H34O13  | 30.2 |
| 38.73_615.2183m/z | HMDB0132839 | M+H      | C31H34O13  | 30.2 |
| 38.73_615.2183m/z | HMDB0132840 | M+H      | C31H34O13  | 30.2 |
| 38.73_615.2183m/z | HMDB0132841 | M+H      | C31H34O13  | 30.2 |
| 38.73_615.2183m/z | HMDB0132842 | M+H      | C31H34O13  | 30.2 |
| 38.73_615.2183m/z | HMDB0132843 | M+H      | C31H34O13  | 30.2 |
| 38.73_615.2183m/z | HMDB0132844 | M+H      | C31H34O13  | 30.2 |
| 38.73_615.2183m/z | HMDB0132845 | M+H      | C31H34O13  | 30.2 |
| 38.73_615.2183m/z | HMDB0132846 | M+H      | C31H34O13  | 30.2 |
| 38.73_615.2183m/z | HMDB0132847 | M+H      | C31H34O13  | 30.2 |
| 38.73_615.2183m/z | HMDB0132848 | M+H      | C31H34O13  | 30.2 |
| 40.74_629.2282m/z | HMDB0031149 | M+Na     | C35H34N4O6 | 30.2 |
| 39.00_615.2230m/z | HMDB0030627 | M+H-2H2O | C31H38O15  | 30.2 |
| 39.00_615.2230m/z | HMDB0034281 | M+H-2H2O | C31H38O15  | 30.2 |
| 38.94_615.2186m/z | HMDB0030627 | M+H-2H2O | C31H38O15  | 30.2 |
| 38.94_615.2186m/z | HMDB0034281 | M+H-2H2O | C31H38O15  | 30.2 |
| 38.04_341.1982m/z | HMDB0001337 | M+Na     | C20H30O3   | 30.2 |
| 38.04_341.1982m/z | HMDB0005081 | M+Na     | C20H30O3   | 30.2 |
| 38.04_341.1982m/z | HMDB0006027 | M+Na     | C20H30O3   | 30.2 |
| 38.04_341.1982m/z | HMDB0010202 | M+Na     | C20H30O3   | 30.2 |
| 38.04_341.1982m/z | HMDB0010205 | M+Na     | C20H30O3   | 30.2 |
| 38.04_341.1982m/z | HMDB0010209 | M+Na     | C20H30O3   | 30.2 |
| 38.04_341.1982m/z | HMDB0010210 | M+Na     | C20H30O3   | 30.2 |
| 38.04_341.1982m/z | HMDB0010212 | M+Na     | C20H30O3   | 30.2 |
| 38.04_341.1982m/z | HMDB0010217 | M+Na     | C20H30O3   | 30.2 |
| 38.04_341.1982m/z | HMDB0012534 | M+Na     | C20H30O3   | 30.2 |
| 38.04_341.1982m/z | HMDB0012611 | M+Na     | C20H30O3   | 30.2 |
| 38.04_341.1982m/z | HMDB0013633 | M+Na     | C20H30O3   | 30.2 |
| 38.04_341.1982m/z | HMDB0030101 | M+Na     | C20H30O3   | 30.2 |
| 38.04_341.1982m/z | HMDB0035116 | M+Na     | C20H30O3   | 30.2 |
| 38.04_341.1982m/z | HMDB0035311 | M+Na     | C20H30O3   | 30.2 |
| 38.04_341.1982m/z | HMDB0036698 | M+Na     | C20H30O3   | 30.2 |
| 38.04_341.1982m/z | HMDB0036706 | M+Na     | C20H30O3   | 30.2 |

|                   |             |      |           |      |
|-------------------|-------------|------|-----------|------|
| 38.04_341.1982m/z | HMDB0036712 | M+Na | C20H30O3  | 30.2 |
| 38.04_341.1982m/z | HMDB0036713 | M+Na | C20H30O3  | 30.2 |
| 38.04_341.1982m/z | HMDB0036724 | M+Na | C20H30O3  | 30.2 |
| 38.04_341.1982m/z | HMDB0036752 | M+Na | C20H30O3  | 30.2 |
| 38.04_341.1982m/z | HMDB0036776 | M+Na | C20H30O3  | 30.2 |
| 38.04_341.1982m/z | HMDB0036806 | M+Na | C20H30O3  | 30.2 |
| 38.04_341.1982m/z | HMDB0036839 | M+Na | C20H30O3  | 30.2 |
| 38.04_341.1982m/z | HMDB0036930 | M+Na | C20H30O3  | 30.2 |
| 38.04_341.1982m/z | HMDB0037523 | M+Na | C20H30O3  | 30.2 |
| 38.04_341.1982m/z | HMDB0038521 | M+Na | C20H30O3  | 30.2 |
| 38.04_341.1982m/z | HMDB0039012 | M+Na | C20H30O3  | 30.2 |
| 38.04_341.1982m/z | HMDB0039716 | M+Na | C20H30O3  | 30.2 |
| 38.04_341.1982m/z | HMDB0041058 | M+Na | C20H30O3  | 30.2 |
| 38.04_341.1982m/z | HMDB0060053 | M+Na | C20H30O3  | 30.2 |
| 38.04_341.1982m/z | HMDB0061114 | M+Na | C20H30O3  | 30.2 |
| 38.04_341.1982m/z | HMDB0062222 | M+Na | C20H30O3  | 30.2 |
| 38.04_341.1982m/z | HMDB0062293 | M+Na | C20H30O3  | 30.2 |
| 38.04_341.1982m/z | HMDB0062296 | M+Na | C20H30O3  | 30.2 |
| 38.04_341.1982m/z | HMDB0062408 | M+Na | C20H30O3  | 30.2 |
| 38.04_341.1982m/z | HMDB0137419 | M+Na | C20H30O3  | 30.2 |
| 38.73_615.2183m/z | HMDB0129415 | M+H  | C31H34O13 | 30.2 |
| 38.73_615.2183m/z | HMDB0129416 | M+H  | C31H34O13 | 30.2 |
| 38.73_615.2183m/z | HMDB0129417 | M+H  | C31H34O13 | 30.2 |
| 38.73_615.2183m/z | HMDB0132767 | M+H  | C31H34O13 | 30.2 |
| 38.73_615.2183m/z | HMDB0132768 | M+H  | C31H34O13 | 30.2 |
| 38.73_615.2183m/z | HMDB0132770 | M+H  | C31H34O13 | 30.2 |
| 38.73_615.2183m/z | HMDB0132771 | M+H  | C31H34O13 | 30.2 |
| 38.73_615.2183m/z | HMDB0132772 | M+H  | C31H34O13 | 30.2 |
| 38.73_615.2183m/z | HMDB0132774 | M+H  | C31H34O13 | 30.2 |
| 38.73_615.2183m/z | HMDB0132775 | M+H  | C31H34O13 | 30.2 |
| 38.73_615.2183m/z | HMDB0132776 | M+H  | C31H34O13 | 30.2 |
| 38.73_615.2183m/z | HMDB0132777 | M+H  | C31H34O13 | 30.2 |
| 38.73_615.2183m/z | HMDB0132778 | M+H  | C31H34O13 | 30.2 |
| 38.73_615.2183m/z | HMDB0132779 | M+H  | C31H34O13 | 30.2 |
| 38.73_615.2183m/z | HMDB0132780 | M+H  | C31H34O13 | 30.2 |
| 38.73_615.2183m/z | HMDB0132782 | M+H  | C31H34O13 | 30.2 |
| 38.73_615.2183m/z | HMDB0132783 | M+H  | C31H34O13 | 30.2 |
| 38.73_615.2183m/z | HMDB0132784 | M+H  | C31H34O13 | 30.2 |
| 38.73_615.2183m/z | HMDB0132786 | M+H  | C31H34O13 | 30.2 |
| 38.73_615.2183m/z | HMDB0132787 | M+H  | C31H34O13 | 30.2 |
| 38.73_615.2183m/z | HMDB0132788 | M+H  | C31H34O13 | 30.2 |
| 38.73_615.2183m/z | HMDB0132789 | M+H  | C31H34O13 | 30.2 |
| 38.73_615.2183m/z | HMDB0132791 | M+H  | C31H34O13 | 30.2 |
| 38.73_615.2183m/z | HMDB0132792 | M+H  | C31H34O13 | 30.2 |
| 38.73_615.2183m/z | HMDB0132793 | M+H  | C31H34O13 | 30.2 |
| 38.73_615.2183m/z | HMDB0132811 | M+H  | C31H34O13 | 30.2 |
| 38.73_615.2183m/z | HMDB0132812 | M+H  | C31H34O13 | 30.2 |
| 38.73_615.2183m/z | HMDB0132813 | M+H  | C31H34O13 | 30.2 |
| 38.73_615.2183m/z | HMDB0132815 | M+H  | C31H34O13 | 30.2 |
| 38.73_615.2183m/z | HMDB0132816 | M+H  | C31H34O13 | 30.2 |

|                   |             |          |            |      |
|-------------------|-------------|----------|------------|------|
| 38.73_615.2183m/z | HMDB0132817 | M+H      | C31H34O13  | 30.2 |
| 38.73_615.2183m/z | HMDB0132819 | M+H      | C31H34O13  | 30.2 |
| 38.73_615.2183m/z | HMDB0132820 | M+H      | C31H34O13  | 30.2 |
| 38.73_615.2183m/z | HMDB0132821 | M+H      | C31H34O13  | 30.2 |
| 38.73_615.2183m/z | HMDB0132822 | M+H      | C31H34O13  | 30.2 |
| 38.73_615.2183m/z | HMDB0132823 | M+H      | C31H34O13  | 30.2 |
| 38.73_615.2183m/z | HMDB0132824 | M+H      | C31H34O13  | 30.2 |
| 38.73_615.2183m/z | HMDB0132825 | M+H      | C31H34O13  | 30.2 |
| 38.73_615.2183m/z | HMDB0132828 | M+H      | C31H34O13  | 30.2 |
| 38.73_615.2183m/z | HMDB0132831 | M+H      | C31H34O13  | 30.2 |
| 38.73_615.2183m/z | HMDB0132832 | M+H      | C31H34O13  | 30.2 |
| 38.73_615.2183m/z | HMDB0132833 | M+H      | C31H34O13  | 30.2 |
| 38.73_615.2183m/z | HMDB0132835 | M+H      | C31H34O13  | 30.2 |
| 38.73_615.2183m/z | HMDB0132836 | M+H      | C31H34O13  | 30.2 |
| 38.73_615.2183m/z | HMDB0132837 | M+H      | C31H34O13  | 30.2 |
| 38.73_615.2183m/z | HMDB0132838 | M+H      | C31H34O13  | 30.2 |
| 38.73_615.2183m/z | HMDB0132839 | M+H      | C31H34O13  | 30.2 |
| 38.73_615.2183m/z | HMDB0132840 | M+H      | C31H34O13  | 30.2 |
| 38.73_615.2183m/z | HMDB0132841 | M+H      | C31H34O13  | 30.2 |
| 38.73_615.2183m/z | HMDB0132842 | M+H      | C31H34O13  | 30.2 |
| 38.73_615.2183m/z | HMDB0132843 | M+H      | C31H34O13  | 30.2 |
| 38.73_615.2183m/z | HMDB0132844 | M+H      | C31H34O13  | 30.2 |
| 38.73_615.2183m/z | HMDB0132845 | M+H      | C31H34O13  | 30.2 |
| 38.73_615.2183m/z | HMDB0132846 | M+H      | C31H34O13  | 30.2 |
| 38.73_615.2183m/z | HMDB0132847 | M+H      | C31H34O13  | 30.2 |
| 38.73_615.2183m/z | HMDB0132848 | M+H      | C31H34O13  | 30.2 |
| 40.74_629.2282m/z | HMDB0031149 | M+Na     | C35H34N4O6 | 30.2 |
| 39.00_615.2230m/z | HMDB0030627 | M+H-2H2O | C31H38O15  | 30.2 |
| 39.00_615.2230m/z | HMDB0034281 | M+H-2H2O | C31H38O15  | 30.2 |
| 38.94_615.2186m/z | HMDB0030627 | M+H-2H2O | C31H38O15  | 30.2 |
| 38.94_615.2186m/z | HMDB0034281 | M+H-2H2O | C31H38O15  | 30.2 |
| 38.04_341.1982m/z | HMDB0001337 | M+Na     | C20H30O3   | 30.2 |
| 38.04_341.1982m/z | HMDB0005081 | M+Na     | C20H30O3   | 30.2 |
| 38.04_341.1982m/z | HMDB0006027 | M+Na     | C20H30O3   | 30.2 |
| 38.04_341.1982m/z | HMDB0010202 | M+Na     | C20H30O3   | 30.2 |
| 38.04_341.1982m/z | HMDB0010205 | M+Na     | C20H30O3   | 30.2 |
| 38.04_341.1982m/z | HMDB0010209 | M+Na     | C20H30O3   | 30.2 |
| 38.04_341.1982m/z | HMDB0010210 | M+Na     | C20H30O3   | 30.2 |
| 38.04_341.1982m/z | HMDB0010212 | M+Na     | C20H30O3   | 30.2 |
| 38.04_341.1982m/z | HMDB0010217 | M+Na     | C20H30O3   | 30.2 |
| 38.04_341.1982m/z | HMDB0012534 | M+Na     | C20H30O3   | 30.2 |
| 38.04_341.1982m/z | HMDB0012611 | M+Na     | C20H30O3   | 30.2 |
| 38.04_341.1982m/z | HMDB0013633 | M+Na     | C20H30O3   | 30.2 |
| 38.04_341.1982m/z | HMDB0030101 | M+Na     | C20H30O3   | 30.2 |
| 38.04_341.1982m/z | HMDB0035116 | M+Na     | C20H30O3   | 30.2 |
| 38.04_341.1982m/z | HMDB0035311 | M+Na     | C20H30O3   | 30.2 |
| 38.04_341.1982m/z | HMDB0036698 | M+Na     | C20H30O3   | 30.2 |
| 38.04_341.1982m/z | HMDB0036706 | M+Na     | C20H30O3   | 30.2 |
| 38.04_341.1982m/z | HMDB0036712 | M+Na     | C20H30O3   | 30.2 |
| 38.04_341.1982m/z | HMDB0036713 | M+Na     | C20H30O3   | 30.2 |

|                   |             |         |            |      |
|-------------------|-------------|---------|------------|------|
| 38.04_341.1982m/z | HMDB0036724 | M+Na    | C20H30O3   | 30.2 |
| 38.04_341.1982m/z | HMDB0036752 | M+Na    | C20H30O3   | 30.2 |
| 38.04_341.1982m/z | HMDB0036776 | M+Na    | C20H30O3   | 30.2 |
| 38.04_341.1982m/z | HMDB0036806 | M+Na    | C20H30O3   | 30.2 |
| 38.04_341.1982m/z | HMDB0036839 | M+Na    | C20H30O3   | 30.2 |
| 38.04_341.1982m/z | HMDB0036930 | M+Na    | C20H30O3   | 30.2 |
| 38.04_341.1982m/z | HMDB0037523 | M+Na    | C20H30O3   | 30.2 |
| 38.04_341.1982m/z | HMDB0038521 | M+Na    | C20H30O3   | 30.2 |
| 38.04_341.1982m/z | HMDB0039012 | M+Na    | C20H30O3   | 30.2 |
| 38.04_341.1982m/z | HMDB0039716 | M+Na    | C20H30O3   | 30.2 |
| 38.04_341.1982m/z | HMDB0041058 | M+Na    | C20H30O3   | 30.2 |
| 38.04_341.1982m/z | HMDB0060053 | M+Na    | C20H30O3   | 30.2 |
| 38.04_341.1982m/z | HMDB0061114 | M+Na    | C20H30O3   | 30.2 |
| 38.04_341.1982m/z | HMDB0062222 | M+Na    | C20H30O3   | 30.2 |
| 38.04_341.1982m/z | HMDB0062293 | M+Na    | C20H30O3   | 30.2 |
| 38.04_341.1982m/z | HMDB0062296 | M+Na    | C20H30O3   | 30.2 |
| 38.04_341.1982m/z | HMDB0062408 | M+Na    | C20H30O3   | 30.2 |
| 38.04_341.1982m/z | HMDB0137419 | M+Na    | C20H30O3   | 30.2 |
| 38.98_616.2241m/z | HMDB0000825 | M+H-H2O | C23H39NO19 | 30.1 |
| 38.98_616.2241m/z | HMDB0006569 | M+H-H2O | C23H39NO19 | 30.1 |
| 39.00_615.2230m/z | HMDB0129415 | M+H     | C31H34O13  | 30.1 |
| 39.00_615.2230m/z | HMDB0129416 | M+H     | C31H34O13  | 30.1 |
| 39.00_615.2230m/z | HMDB0129417 | M+H     | C31H34O13  | 30.1 |
| 39.00_615.2230m/z | HMDB0132767 | M+H     | C31H34O13  | 30.1 |
| 39.00_615.2230m/z | HMDB0132768 | M+H     | C31H34O13  | 30.1 |
| 39.00_615.2230m/z | HMDB0132770 | M+H     | C31H34O13  | 30.1 |
| 39.00_615.2230m/z | HMDB0132771 | M+H     | C31H34O13  | 30.1 |
| 39.00_615.2230m/z | HMDB0132772 | M+H     | C31H34O13  | 30.1 |
| 39.00_615.2230m/z | HMDB0132774 | M+H     | C31H34O13  | 30.1 |
| 39.00_615.2230m/z | HMDB0132775 | M+H     | C31H34O13  | 30.1 |
| 39.00_615.2230m/z | HMDB0132776 | M+H     | C31H34O13  | 30.1 |
| 39.00_615.2230m/z | HMDB0132777 | M+H     | C31H34O13  | 30.1 |
| 39.00_615.2230m/z | HMDB0132778 | M+H     | C31H34O13  | 30.1 |
| 39.00_615.2230m/z | HMDB0132779 | M+H     | C31H34O13  | 30.1 |
| 39.00_615.2230m/z | HMDB0132780 | M+H     | C31H34O13  | 30.1 |
| 39.00_615.2230m/z | HMDB0132782 | M+H     | C31H34O13  | 30.1 |
| 39.00_615.2230m/z | HMDB0132783 | M+H     | C31H34O13  | 30.1 |
| 39.00_615.2230m/z | HMDB0132784 | M+H     | C31H34O13  | 30.1 |
| 39.00_615.2230m/z | HMDB0132786 | M+H     | C31H34O13  | 30.1 |
| 39.00_615.2230m/z | HMDB0132787 | M+H     | C31H34O13  | 30.1 |
| 39.00_615.2230m/z | HMDB0132788 | M+H     | C31H34O13  | 30.1 |
| 39.00_615.2230m/z | HMDB0132789 | M+H     | C31H34O13  | 30.1 |
| 39.00_615.2230m/z | HMDB0132791 | M+H     | C31H34O13  | 30.1 |
| 39.00_615.2230m/z | HMDB0132792 | M+H     | C31H34O13  | 30.1 |
| 39.00_615.2230m/z | HMDB0132793 | M+H     | C31H34O13  | 30.1 |
| 39.00_615.2230m/z | HMDB0132811 | M+H     | C31H34O13  | 30.1 |
| 39.00_615.2230m/z | HMDB0132812 | M+H     | C31H34O13  | 30.1 |
| 39.00_615.2230m/z | HMDB0132813 | M+H     | C31H34O13  | 30.1 |
| 39.00_615.2230m/z | HMDB0132815 | M+H     | C31H34O13  | 30.1 |
| 39.00_615.2230m/z | HMDB0132816 | M+H     | C31H34O13  | 30.1 |





|                   |             |          |            |      |
|-------------------|-------------|----------|------------|------|
| 38.94_615.2186m/z | HMDB0132793 | M+H      | C31H34O13  | 30.1 |
| 38.94_615.2186m/z | HMDB0132811 | M+H      | C31H34O13  | 30.1 |
| 38.94_615.2186m/z | HMDB0132812 | M+H      | C31H34O13  | 30.1 |
| 38.94_615.2186m/z | HMDB0132813 | M+H      | C31H34O13  | 30.1 |
| 38.94_615.2186m/z | HMDB0132815 | M+H      | C31H34O13  | 30.1 |
| 38.94_615.2186m/z | HMDB0132816 | M+H      | C31H34O13  | 30.1 |
| 38.94_615.2186m/z | HMDB0132817 | M+H      | C31H34O13  | 30.1 |
| 38.94_615.2186m/z | HMDB0132819 | M+H      | C31H34O13  | 30.1 |
| 38.94_615.2186m/z | HMDB0132820 | M+H      | C31H34O13  | 30.1 |
| 38.94_615.2186m/z | HMDB0132821 | M+H      | C31H34O13  | 30.1 |
| 38.94_615.2186m/z | HMDB0132822 | M+H      | C31H34O13  | 30.1 |
| 38.94_615.2186m/z | HMDB0132823 | M+H      | C31H34O13  | 30.1 |
| 38.94_615.2186m/z | HMDB0132824 | M+H      | C31H34O13  | 30.1 |
| 38.94_615.2186m/z | HMDB0132825 | M+H      | C31H34O13  | 30.1 |
| 38.94_615.2186m/z | HMDB0132828 | M+H      | C31H34O13  | 30.1 |
| 38.94_615.2186m/z | HMDB0132831 | M+H      | C31H34O13  | 30.1 |
| 38.94_615.2186m/z | HMDB0132832 | M+H      | C31H34O13  | 30.1 |
| 38.94_615.2186m/z | HMDB0132833 | M+H      | C31H34O13  | 30.1 |
| 38.94_615.2186m/z | HMDB0132835 | M+H      | C31H34O13  | 30.1 |
| 38.94_615.2186m/z | HMDB0132836 | M+H      | C31H34O13  | 30.1 |
| 38.94_615.2186m/z | HMDB0132837 | M+H      | C31H34O13  | 30.1 |
| 38.94_615.2186m/z | HMDB0132838 | M+H      | C31H34O13  | 30.1 |
| 38.94_615.2186m/z | HMDB0132839 | M+H      | C31H34O13  | 30.1 |
| 38.94_615.2186m/z | HMDB0132840 | M+H      | C31H34O13  | 30.1 |
| 38.94_615.2186m/z | HMDB0132841 | M+H      | C31H34O13  | 30.1 |
| 38.94_615.2186m/z | HMDB0132842 | M+H      | C31H34O13  | 30.1 |
| 38.94_615.2186m/z | HMDB0132843 | M+H      | C31H34O13  | 30.1 |
| 38.94_615.2186m/z | HMDB0132844 | M+H      | C31H34O13  | 30.1 |
| 38.94_615.2186m/z | HMDB0132845 | M+H      | C31H34O13  | 30.1 |
| 38.94_615.2186m/z | HMDB0132846 | M+H      | C31H34O13  | 30.1 |
| 38.94_615.2186m/z | HMDB0132847 | M+H      | C31H34O13  | 30.1 |
| 38.94_615.2186m/z | HMDB0132848 | M+H      | C31H34O13  | 30.1 |
| 38.04_341.1982m/z | HMDB0014722 | M+H-2H2O | C20H28N2O5 | 30.1 |
| 38.04_341.1982m/z | HMDB0015036 | M+H-2H2O | C20H28N2O5 | 30.1 |
| 27.53_496.1463m/z | HMDB0014624 | M+Na     | C28H27NO4S | 30.1 |
| 0.29_156.0199m/z  | HMDB0002916 | M+H      | C6H5NO4    | 30.1 |
| 0.29_156.0199m/z  | HMDB0006200 | M+H      | C6H5NO4    | 30.1 |
| 0.29_156.0199m/z  | HMDB0062694 | M+H      | C6H5NO4    | 30.1 |
| 38.98_616.2241m/z | HMDB0000825 | M+H-H2O  | C23H39NO19 | 30.1 |
| 38.98_616.2241m/z | HMDB0006569 | M+H-H2O  | C23H39NO19 | 30.1 |
| 39.00_615.2230m/z | HMDB0129415 | M+H      | C31H34O13  | 30.1 |
| 39.00_615.2230m/z | HMDB0129416 | M+H      | C31H34O13  | 30.1 |
| 39.00_615.2230m/z | HMDB0129417 | M+H      | C31H34O13  | 30.1 |
| 39.00_615.2230m/z | HMDB0132767 | M+H      | C31H34O13  | 30.1 |
| 39.00_615.2230m/z | HMDB0132768 | M+H      | C31H34O13  | 30.1 |
| 39.00_615.2230m/z | HMDB0132770 | M+H      | C31H34O13  | 30.1 |
| 39.00_615.2230m/z | HMDB0132771 | M+H      | C31H34O13  | 30.1 |
| 39.00_615.2230m/z | HMDB0132772 | M+H      | C31H34O13  | 30.1 |
| 39.00_615.2230m/z | HMDB0132774 | M+H      | C31H34O13  | 30.1 |
| 39.00_615.2230m/z | HMDB0132775 | M+H      | C31H34O13  | 30.1 |





|                   |             |          |            |      |
|-------------------|-------------|----------|------------|------|
| 38.94_615.2186m/z | HMDB0132847 | M+H      | C31H34O13  | 30.1 |
| 38.94_615.2186m/z | HMDB0132848 | M+H      | C31H34O13  | 30.1 |
| 38.04_341.1982m/z | HMDB0014722 | M+H-2H2O | C20H28N2O5 | 30.1 |
| 38.04_341.1982m/z | HMDB0015036 | M+H-2H2O | C20H28N2O5 | 30.1 |
| 27.53_496.1463m/z | HMDB0014624 | M+Na     | C28H27NO4S | 30.1 |

| Mass Error (ppm) | Isotope Similarity | Theoretical Isotope Distribution  |
|------------------|--------------------|-----------------------------------|
|                  |                    |                                   |
| 1.816.731.948    | 9.020.664.073      | 100 - 22.9 - 5.38 - 0.831 - 0.119 |
| 1.816.731.948    | 9.020.664.073      | 100 - 22.9 - 5.38 - 0.831 - 0.119 |
| 1.696.708.715    | 8.973.038.008      | 100 - 23 - 5.82 - 0.932 - 0.142   |
| 1.696.708.715    | 8.973.038.008      | 100 - 23 - 5.82 - 0.932 - 0.142   |
| 1.696.708.715    | 8.973.038.008      | 100 - 23 - 5.82 - 0.932 - 0.142   |
| 1.696.708.715    | 8.973.038.008      | 100 - 23 - 5.82 - 0.932 - 0.142   |
| 1.696.708.715    | 8.973.038.008      | 100 - 23 - 5.82 - 0.932 - 0.142   |
| 1.696.708.715    | 8.973.038.008      | 100 - 23 - 5.82 - 0.932 - 0.142   |
| -1.565.071.067   | 8.077.684.174      | 100 - 19.1 - 4.18 - 0.566         |
| -1.565.071.067   | 8.077.684.174      | 100 - 19.1 - 4.18 - 0.566         |
| -1.565.071.067   | 8.077.684.174      | 100 - 19.1 - 4.18 - 0.566         |
| -1.565.071.067   | 8.077.684.174      | 100 - 19.1 - 4.18 - 0.566         |
| -1.565.071.067   | 8.077.684.174      | 100 - 19.1 - 4.18 - 0.566         |
| -1.565.071.067   | 8.077.684.174      | 100 - 19.1 - 4.18 - 0.566         |
| -1.565.071.067   | 8.077.684.174      | 100 - 19.1 - 4.18 - 0.566         |
| -1.565.071.067   | 8.077.684.174      | 100 - 19.1 - 4.18 - 0.566         |
| -1.565.071.067   | 8.077.684.174      | 100 - 19.1 - 4.18 - 0.566         |
| -4.452.615.482   | 8.308.858.912      | 100 - 16.2 - 3.7 - 0.457          |
| -4.452.615.482   | 8.308.858.912      | 100 - 16.2 - 3.7 - 0.457          |
| -5.228.828.358   | 8.327.628.913      | 100 - 44.1 - 11.5 - 2.23 - 0.349  |
| -5.228.828.358   | 8.327.628.913      | 100 - 44.1 - 11.5 - 2.23 - 0.349  |
| -5.228.828.358   | 8.327.628.913      | 100 - 44.1 - 11.5 - 2.23 - 0.349  |
| -1.051.492.245   | 7.869.278.511      | 100 - 23.5 - 3.25 - 0.333         |
| -1.051.492.245   | 7.869.278.511      | 100 - 23.5 - 3.25 - 0.333         |
| -5.228.828.358   | 8.327.628.913      | 100 - 44.1 - 11.5 - 2.23 - 0.349  |
| -5.228.828.358   | 8.327.628.913      | 100 - 44.1 - 11.5 - 2.23 - 0.349  |
| -5.228.828.358   | 8.327.628.913      | 100 - 44.1 - 11.5 - 2.23 - 0.349  |
| -1.051.492.245   | 7.869.278.511      | 100 - 23.5 - 3.25 - 0.333         |
| -1.051.492.245   | 7.869.278.511      | 100 - 23.5 - 3.25 - 0.333         |
| -2.084.679.526   | 7.937.090.878      | 100 - 26.8 - 7.14 - 1.27 - 0.208  |
| -2.084.679.527   | 7.937.090.878      | 100 - 26.8 - 7.14 - 1.27 - 0.208  |
| -2.084.679.526   | 7.937.090.878      | 100 - 26.8 - 7.14 - 1.27 - 0.208  |
| -2.084.679.527   | 7.937.090.878      | 100 - 26.8 - 7.14 - 1.27 - 0.208  |
| 2.895.326.239    | 7.973.545.924      | 100 - 22.4 - 2.8 - 0.254          |
| 2.895.326.239    | 7.973.545.924      | 100 - 22.4 - 2.8 - 0.254          |
| 64.359.989       | 8.038.185.957      | 100 - 21.4 - 2.78 - 0.271         |
| 64.359.989       | 8.038.185.957      | 100 - 21.4 - 2.78 - 0.271         |
| 2.378.515.589    | 9.386.541.213      | 100 - 5.98 - 0.56                 |
| 2.378.515.589    | 9.386.541.213      | 100 - 5.98 - 0.56                 |
| 2.378.515.589    | 9.386.541.213      | 100 - 5.98 - 0.56                 |
| 2.378.515.589    | 9.386.541.213      | 100 - 5.98 - 0.56                 |
| 2.378.515.589    | 9.386.541.213      | 100 - 5.98 - 0.56                 |
| 2.378.515.589    | 9.386.541.213      | 100 - 5.98 - 0.56                 |
| 2.378.515.589    | 9.386.541.213      | 100 - 5.98 - 0.56                 |
| 2.378.515.589    | 9.386.541.213      | 100 - 5.98 - 0.56                 |
| 2.378.515.589    | 9.386.541.213      | 100 - 5.98 - 0.56                 |
| 2.378.515.589    | 9.386.541.213      | 100 - 5.98 - 0.56                 |
| 2.378.515.589    | 9.386.541.213      | 100 - 5.98 - 0.56                 |
| -5.564.849.437   | 7.728.332.677      | 100 - 24.7 - 4.16 - 0.526         |
| 1.289.553.642    | 8.450.122.254      | 100 - 30.3 - 6.48 - 1.04 - 0.138  |

|                |               |                                   |
|----------------|---------------|-----------------------------------|
| 1.246.953.867  | 8.427.802.309 | 100 - 30.3 - 6.71 - 1.1 - 0.152   |
| 1.246.953.867  | 8.427.802.309 | 100 - 30.3 - 6.71 - 1.1 - 0.152   |
| 1.806.025.151  | 728.976.974   | 100 - 30.3 - 5.88 - 0.854 - 0.101 |
| 1.806.025.151  | 728.976.974   | 100 - 30.3 - 5.88 - 0.854 - 0.101 |
| 1.806.025.151  | 728.976.974   | 100 - 30.3 - 5.88 - 0.854 - 0.101 |
| 1.806.025.151  | 728.976.974   | 100 - 30.3 - 5.88 - 0.854 - 0.101 |
| 1.726.506.549  | 8.630.633.261 | 100 - 39.9 - 10.4 - 2.04 - 0.329  |
| 1.726.506.549  | 8.630.633.261 | 100 - 39.9 - 10.4 - 2.04 - 0.329  |
| 1.726.506.549  | 8.630.633.261 | 100 - 39.9 - 10.4 - 2.04 - 0.329  |
| 8.022.239.675  | 7.786.048.389 | 100 - 22.8 - 4.94 - 0.731         |
| 1.726.506.549  | 8.630.633.261 | 100 - 39.9 - 10.4 - 2.04 - 0.329  |
| 1.726.506.549  | 8.630.633.261 | 100 - 39.9 - 10.4 - 2.04 - 0.329  |
| 1.726.506.549  | 8.630.633.261 | 100 - 39.9 - 10.4 - 2.04 - 0.329  |
| 8.022.239.675  | 7.786.048.389 | 100 - 22.8 - 4.94 - 0.731         |
| -1.480.719.457 | 8.332.409.642 | 100 - 27.5 - 10 - 2.02 - 0.361    |
| -1.480.719.457 | 8.332.409.642 | 100 - 27.5 - 10 - 2.02 - 0.361    |
| -1.480.719.457 | 8.332.409.642 | 100 - 27.5 - 10 - 2.02 - 0.361    |
| -1.480.719.457 | 8.332.409.642 | 100 - 27.5 - 10 - 2.02 - 0.361    |
| -4.705.949.144 | 728.212.774   | 100 - 26.2 - 9.06 - 1.74 - 0.28   |
| 1.485.857.441  | 8.270.237.267 | 100 - 17.9 - 2.74 - 0.299         |
| 1.485.857.441  | 8.270.237.267 | 100 - 17.9 - 2.74 - 0.299         |
| 2.384.745.986  | 6.952.247.037 | 100 - 33.5 - 8.52 - 1.6 - 0.255   |
| -0.118742392   | 6.445.408.393 | 100 - 42.5 - 10.5 - 1.89 - 0.273  |
| -9.130.519.889 | 7.386.928.233 | 100 - 26.8 - 7.14 - 1.27 - 0.208  |
| -9.130.519.889 | 7.386.928.233 | 100 - 26.8 - 7.14 - 1.27 - 0.208  |
| -3.453.916.598 | 6.710.130.002 | 100 - 35.8 - 10.5 - 2.24 - 0.414  |
| -3.453.916.598 | 6.710.130.002 | 100 - 35.8 - 10.5 - 2.24 - 0.414  |
| -3.453.916.598 | 6.710.130.002 | 100 - 35.8 - 10.5 - 2.24 - 0.414  |
| -3.453.916.598 | 6.710.130.002 | 100 - 35.8 - 10.5 - 2.24 - 0.414  |
| -3.453.916.598 | 6.710.130.002 | 100 - 35.8 - 10.5 - 2.24 - 0.414  |
| -3.453.916.598 | 6.710.130.002 | 100 - 35.8 - 10.5 - 2.24 - 0.414  |
| -3.453.916.598 | 6.710.130.002 | 100 - 35.8 - 10.5 - 2.24 - 0.414  |
| -3.453.916.598 | 6.710.130.002 | 100 - 35.8 - 10.5 - 2.24 - 0.414  |
| -3.453.916.598 | 6.710.130.002 | 100 - 35.8 - 10.5 - 2.24 - 0.414  |
| -3.453.916.598 | 6.710.130.002 | 100 - 35.8 - 10.5 - 2.24 - 0.414  |
| -3.453.916.598 | 6.710.130.002 | 100 - 35.8 - 10.5 - 2.24 - 0.414  |
| -3.453.916.598 | 6.710.130.002 | 100 - 35.8 - 10.5 - 2.24 - 0.414  |
| -3.453.916.598 | 6.710.130.002 | 100 - 35.8 - 10.5 - 2.24 - 0.414  |
| 141.926.193    | 7.747.896.643 | 100 - 19.4 - 8.15 - 1.3 - 0.231   |
| 276.353.559    | 6.579.736.483 | 100 - 39.8 - 9.99 - 1.87 - 0.287  |
| 276.353.559    | 6.579.736.483 | 100 - 39.8 - 9.99 - 1.87 - 0.287  |
| 276.353.559    | 6.579.736.483 | 100 - 39.8 - 9.99 - 1.87 - 0.287  |
| 141.926.193    | 7.747.896.643 | 100 - 19.4 - 8.15 - 1.3 - 0.231   |
| 276.353.559    | 6.579.736.483 | 100 - 39.8 - 9.99 - 1.87 - 0.287  |
| 276.353.559    | 6.579.736.483 | 100 - 39.8 - 9.99 - 1.87 - 0.287  |
| 276.353.559    | 6.579.736.483 | 100 - 39.8 - 9.99 - 1.87 - 0.287  |
| -1.491.648.852 | 7.733.729.493 | 100 - 23 - 5.39 - 0.835 - 0.119   |
| -1.905.963.047 | 6.445.408.393 | 100 - 42.5 - 10.5 - 1.89 - 0.273  |
| 6.388.584.759  | 6.822.276.909 | 100 - 35.6 - 9.02 - 1.71 - 0.27   |
| 3.167.556.779  | 6.444.456.546 | 100 - 40.1 - 11.9 - 2.64 - 0.493  |

|                |               |                                  |
|----------------|---------------|----------------------------------|
| 3.167.556.779  | 6.444.456.546 | 100 - 40.1 - 11.9 - 2.64 - 0.493 |
| 3.167.556.779  | 6.444.456.546 | 100 - 40.1 - 11.9 - 2.64 - 0.493 |
| 3.167.556.779  | 6.444.456.546 | 100 - 40.1 - 11.9 - 2.64 - 0.493 |
| 3.167.556.779  | 6.444.456.546 | 100 - 40.1 - 11.9 - 2.64 - 0.493 |
| 3.167.556.779  | 6.444.456.546 | 100 - 40.1 - 11.9 - 2.64 - 0.493 |
| 3.167.556.779  | 6.444.456.546 | 100 - 40.1 - 11.9 - 2.64 - 0.493 |
| 3.167.556.779  | 6.444.456.546 | 100 - 40.1 - 11.9 - 2.64 - 0.493 |
| 3.167.556.779  | 6.444.456.546 | 100 - 40.1 - 11.9 - 2.64 - 0.493 |
| 3.167.556.779  | 6.444.456.546 | 100 - 40.1 - 11.9 - 2.64 - 0.493 |
| 3.167.556.779  | 6.444.456.546 | 100 - 40.1 - 11.9 - 2.64 - 0.493 |
| 3.167.556.779  | 6.444.456.546 | 100 - 40.1 - 11.9 - 2.64 - 0.493 |
| 8.175.820.239  | 6.822.276.909 | 100 - 35.6 - 9.02 - 1.71 - 0.27  |
| 1.874.704.691  | 7.792.469.931 | 100 - 24.3 - 3.64 - 0.408        |
| 1.874.704.691  | 7.792.469.931 | 100 - 24.3 - 3.64 - 0.408        |
| 4.186.559.156  | 9.310.047.107 | 100 - 7 - 0.414                  |
| 8.175.820.239  | 6.822.276.909 | 100 - 35.6 - 9.02 - 1.71 - 0.27  |
| -6.301.990.458 | 6.552.008.835 | 100 - 38 - 11.6 - 2.56 - 0.488   |
| -1.854.540.535 | 771.190.327   | 100 - 24.7 - 4.37 - 0.578        |
| -1.854.540.535 | 771.190.327   | 100 - 24.7 - 4.37 - 0.578        |
| -1.854.540.535 | 771.190.327   | 100 - 24.7 - 4.37 - 0.578        |
| -1.854.540.535 | 771.190.327   | 100 - 24.7 - 4.37 - 0.578        |
| 4.313.137.491  | 630.254.915   | 100 - 43.2 - 12.4 - 2.66 - 0.473 |
| 1.490.140.493  | 727.205.638   | 100 - 25.4 - 9.87 - 1.92 - 0.36  |
| -9.839.207.154 | 6.770.611.539 | 100 - 33 - 11.6 - 2.61 - 0.484   |
| -2.619.347.796 | 8.143.883.674 | 100 - 19.6 - 2.85 - 0.308        |
| 1.367.457.802  | 7.115.846.309 | 100 - 32.4 - 6.92 - 1.11 - 0.146 |
| 1.367.457.802  | 7.115.846.309 | 100 - 32.4 - 6.92 - 1.11 - 0.146 |
| 1.415.452.391  | 7.134.694.529 | 100 - 32.3 - 6.69 - 1.04 - 0.132 |
| 1.415.452.391  | 7.134.694.529 | 100 - 32.3 - 6.69 - 1.04 - 0.132 |
| -1.061.683.198 | 6.771.559.477 | 100 - 37.8 - 8.37 - 1.37 - 0.18  |
| -5.138.438.099 | 9.447.897.499 | 100 - 4.92 - 0.919               |
| -5.138.438.099 | 9.447.897.499 | 100 - 4.92 - 0.919               |
| -5.138.438.099 | 9.447.897.499 | 100 - 4.92 - 0.919               |
| -5.138.438.099 | 9.447.897.499 | 100 - 4.92 - 0.919               |
| -5.138.438.099 | 9.447.897.499 | 100 - 4.92 - 0.919               |
| -1.061.683.198 | 6.771.559.477 | 100 - 37.8 - 8.37 - 1.37 - 0.18  |
| -186.704.287   | 7.258.062.165 | 100 - 31.4 - 5.6 - 0.727         |
| 4.421.005.008  | 8.900.129.962 | 100 - 11.4 - 0.997               |
| 4.421.005.008  | 8.900.129.962 | 100 - 11.4 - 0.997               |
| 4.421.005.008  | 8.900.129.962 | 100 - 11.4 - 0.997               |
| 4.421.005.008  | 8.900.129.962 | 100 - 11.4 - 0.997               |
| -186.704.287   | 7.258.062.165 | 100 - 31.4 - 5.6 - 0.727         |
| 4.421.005.008  | 8.900.129.962 | 100 - 11.4 - 0.997               |
| 4.421.005.008  | 8.900.129.962 | 100 - 11.4 - 0.997               |
| 4.421.005.008  | 8.900.129.962 | 100 - 11.4 - 0.997               |
| 4.421.005.008  | 8.900.129.962 | 100 - 11.4 - 0.997               |
| 2.054.858.767  | 7.369.698.317 | 100 - 28.2 - 6.3 - 1.03 - 0.143  |
| 2.054.858.767  | 7.369.698.317 | 100 - 28.2 - 6.3 - 1.03 - 0.143  |
| 8.856.224.752  | 632.120.445   | 100 - 44.1 - 11.5 - 2.23 - 0.349 |
| 8.856.224.752  | 632.120.445   | 100 - 44.1 - 11.5 - 2.23 - 0.349 |























|                |               |                                  |
|----------------|---------------|----------------------------------|
| 184.533.574    | 6.915.731.428 | 100 - 34.4 - 8.41 - 1.54 - 0.234 |
| 184.533.574    | 6.915.731.428 | 100 - 34.4 - 8.41 - 1.54 - 0.234 |
| 3.247.836.587  | 7.885.945.044 | 100 - 22.9 - 3.53 - 0.408        |
| 3.247.836.587  | 7.885.945.044 | 100 - 22.9 - 3.53 - 0.408        |
| -1.893.266.346 | 6.911.641.802 | 100 - 31.9 - 10.3 - 2.16 - 0.348 |



























|                                                                                                                                                       |
|-------------------------------------------------------------------------------------------------------------------------------------------------------|
| <a href="http://nonlinear.com/redirect/outbound?p=hmdb&amp;param=HMDB0132847">http://nonlinear.com/redirect/outbound?p=hmdb&amp;param=HMDB0132847</a> |
|-------------------------------------------------------------------------------------------------------------------------------------------------------|

|                                                                                                                                                       |
|-------------------------------------------------------------------------------------------------------------------------------------------------------|
| <a href="http://nonlinear.com/redirect/outbound?p=hmdb&amp;param=HMDB0132848">http://nonlinear.com/redirect/outbound?p=hmdb&amp;param=HMDB0132848</a> |
|-------------------------------------------------------------------------------------------------------------------------------------------------------|

|                                                                                                                                                       |
|-------------------------------------------------------------------------------------------------------------------------------------------------------|
| <a href="http://nonlinear.com/redirect/outbound?p=hmdb&amp;param=HMDB0014722">http://nonlinear.com/redirect/outbound?p=hmdb&amp;param=HMDB0014722</a> |
|-------------------------------------------------------------------------------------------------------------------------------------------------------|

|                                                                                                                                                       |
|-------------------------------------------------------------------------------------------------------------------------------------------------------|
| <a href="http://nonlinear.com/redirect/outbound?p=hmdb&amp;param=HMDB0015036">http://nonlinear.com/redirect/outbound?p=hmdb&amp;param=HMDB0015036</a> |
|-------------------------------------------------------------------------------------------------------------------------------------------------------|

|                                                                                                                                                       |
|-------------------------------------------------------------------------------------------------------------------------------------------------------|
| <a href="http://nonlinear.com/redirect/outbound?p=hmdb&amp;param=HMDB0014624">http://nonlinear.com/redirect/outbound?p=hmdb&amp;param=HMDB0014624</a> |
|-------------------------------------------------------------------------------------------------------------------------------------------------------|

|                                                                                                                                               |
|-----------------------------------------------------------------------------------------------------------------------------------------------|
| Description                                                                                                                                   |
|                                                                                                                                               |
| Dide-O-methyl-4-O-alpha-D-glucopyranosylsimmondsin                                                                                            |
| Dide-O-methyl-4-O-alpha-D-glucopyranosylsimmondsin                                                                                            |
| Lacto-N-triaose                                                                                                                               |
| Lacto-N-triose I                                                                                                                              |
| N-Acetylgalactosaminyl lactose                                                                                                                |
| Lacto-N-triaose                                                                                                                               |
| Lacto-N-triose I                                                                                                                              |
| N-Acetylgalactosaminyl lactose                                                                                                                |
| 6-[[6-(2-carboxyeth-1-en-1-yl)-4-methoxy-2H-1,3-benzodioxol-5-yl]oxy]-3,4,5-trihydroxyoxane-2-carboxylic acid                                 |
| 3,4,5-trihydroxy-6-[[3-(6-hydroxy-7-methoxy-2H-1,3-benzodioxol-5-yl)prop-2-enoyl]oxy]oxane-2-carboxylic acid                                  |
| 6-[[6-(2-carboxyeth-1-en-1-yl)-5-methoxy-2H-1,3-benzodioxol-4-yl]oxy]-3,4,5-trihydroxyoxane-2-carboxylic acid                                 |
| 3,4,5-trihydroxy-6-[[3-(7-hydroxy-6-methoxy-2H-1,3-benzodioxol-5-yl)prop-2-enoyl]oxy]oxane-2-carboxylic acid                                  |
| 6-[[6-(2-carboxyeth-1-en-1-yl)-4-methoxy-2H-1,3-benzodioxol-5-yl]oxy]-3,4,5-trihydroxyoxane-2-carboxylic acid                                 |
| 3,4,5-trihydroxy-6-[[3-(6-hydroxy-7-methoxy-2H-1,3-benzodioxol-5-yl)prop-2-enoyl]oxy]oxane-2-carboxylic acid                                  |
| 6-[[6-(2-carboxyeth-1-en-1-yl)-5-methoxy-2H-1,3-benzodioxol-4-yl]oxy]-3,4,5-trihydroxyoxane-2-carboxylic acid                                 |
| 3,4,5-trihydroxy-6-[[3-(7-hydroxy-6-methoxy-2H-1,3-benzodioxol-5-yl)prop-2-enoyl]oxy]oxane-2-carboxylic acid                                  |
| SAICAR                                                                                                                                        |
| SAICAR                                                                                                                                        |
| Kuwanon J                                                                                                                                     |
| Artonin C                                                                                                                                     |
| 3-(2,4-dihydroxyphenyl)-1-{3-[5-(2,4-dihydroxyphenyl)-6-(5-hydroxy-2,2-dimethyl-2H-chromene-6-carbonyl)-3-methoxy]prop-1-en-1-yl}propan-1-one |
| Methantheline                                                                                                                                 |
| Mepenzolate                                                                                                                                   |
| Kuwanon J                                                                                                                                     |
| Artonin C                                                                                                                                     |
| 3-(2,4-dihydroxyphenyl)-1-{3-[5-(2,4-dihydroxyphenyl)-6-(5-hydroxy-2,2-dimethyl-2H-chromene-6-carbonyl)-3-methoxy]prop-1-en-1-yl}propan-1-one |
| Methantheline                                                                                                                                 |
| Mepenzolate                                                                                                                                   |
| 3'-Sialyllactosamine                                                                                                                          |
| 6'-Sialyllactosamine                                                                                                                          |
| 3'-Sialyllactosamine                                                                                                                          |
| 6'-Sialyllactosamine                                                                                                                          |
| Pentamidine                                                                                                                                   |
| Pentamidine                                                                                                                                   |
| Glycopyrrolate                                                                                                                                |
| Glycopyrrolate                                                                                                                                |
| Betaine                                                                                                                                       |
| L-Valine                                                                                                                                      |
| Vaporole                                                                                                                                      |
| N-Methyl-alpha-aminoisobutyric acid                                                                                                           |
| 5-Aminopentanoic acid                                                                                                                         |
| Norvaline                                                                                                                                     |
| Amyl Nitrite                                                                                                                                  |
| Betaine                                                                                                                                       |
| L-Valine                                                                                                                                      |
| Vaporole                                                                                                                                      |
| 5-Methyltetrahydrofolic acid                                                                                                                  |
| Daunorubicin                                                                                                                                  |









|                                                                                                                     |
|---------------------------------------------------------------------------------------------------------------------|
| 6-{{6-(5,7-dihydroxy-4-oxo-3,4-dihydro-2H-1-benzopyran-2-yl)-2-(1-hydroxy-4-methylpent-3-en-1-yl)-2-methyl-2H-c     |
| 3,4,5-trihydroxy-6-{{5-hydroxy-2-[7-hydroxy-2-(1-hydroxy-4-methylpent-3-en-1-yl)-2-methyl-2H-chromen-6-yl]-4-ox     |
| 3,4,5-trihydroxy-6-{{7-hydroxy-2-[7-hydroxy-2-(1-hydroxy-4-methylpent-3-en-1-yl)-2-methyl-2H-chromen-6-yl]-4-ox     |
| 6-{{5,7-dihydroxy-2-[7-hydroxy-2-methyl-2-(4-methylpent-3-en-1-yl)-2H-chromen-6-yl]-4-oxo-3,4-dihydro-2H-1-ben      |
| 3,4,5-trihydroxy-6-{{2-methyl-2-(4-methylpent-3-en-1-yl)-6-(5,6,7-trihydroxy-4-oxo-3,4-dihydro-2H-1-benzopyran-2-   |
| 6-{{5,6-dihydroxy-2-[7-hydroxy-2-methyl-2-(4-methylpent-3-en-1-yl)-2H-chromen-6-yl]-4-oxo-3,4-dihydro-2H-1-ben      |
| 6-{{6,7-dihydroxy-2-[7-hydroxy-2-methyl-2-(4-methylpent-3-en-1-yl)-2H-chromen-6-yl]-4-oxo-3,4-dihydro-2H-1-ben      |
| 6-{{6-(5,7-dihydroxy-4-oxo-3,4-dihydro-2H-1-benzopyran-2-yl)-2-(5-hydroxy-4-methylpent-3-en-1-yl)-2-methyl-2H-c     |
| 3,4,5-trihydroxy-6-{{5-hydroxy-2-[7-hydroxy-2-(5-hydroxy-4-methylpent-3-en-1-yl)-2-methyl-2H-chromen-6-yl]-4-ox     |
| 3,4,5-trihydroxy-6-{{7-hydroxy-2-[7-hydroxy-2-(5-hydroxy-4-methylpent-3-en-1-yl)-2-methyl-2H-chromen-6-yl]-4-ox     |
| 3,4,5-trihydroxy-6-{{5-hydroxy-2-[7-hydroxy-2-[(3E)-5-hydroxy-4-methylpent-3-en-1-yl]-2-methyl-2H-chromen-6-yl]-    |
| 6-{{6-(5,7-dihydroxy-4-oxo-3,4-dihydro-2H-1-benzopyran-2-yl)-2-(2-hydroxy-4-methylpent-3-en-1-yl)-2-methyl-2H-c     |
| 3,4,5-trihydroxy-6-{{5-hydroxy-2-[7-hydroxy-2-(2-hydroxy-4-methylpent-3-en-1-yl)-2-methyl-2H-chromen-6-yl]-4-ox     |
| 3,4,5-trihydroxy-6-{{7-hydroxy-2-[7-hydroxy-2-(2-hydroxy-4-methylpent-3-en-1-yl)-2-methyl-2H-chromen-6-yl]-4-ox     |
| 6-{{6-(5,7-dihydroxy-4-oxo-3,4-dihydro-2H-1-benzopyran-2-yl)-2-[2-(3,3-dimethyloxiran-2-yl)ethyl]-2-methyl-2H-chr   |
| 6-[[2-{2-[2-(3,3-dimethyloxiran-2-yl)ethyl]-7-hydroxy-2-methyl-2H-chromen-6-yl]-5-hydroxy-4-oxo-3,4-dihydro-2H-1    |
| 6-[[2-{2-[2-(3,3-dimethyloxiran-2-yl)ethyl]-7-hydroxy-2-methyl-2H-chromen-6-yl]-7-hydroxy-4-oxo-3,4-dihydro-2H-1    |
| 6-{{10-(5,7-dihydroxy-4-oxo-3,4-dihydro-2H-1-benzopyran-2-yl)-5-methyl-5-(4-methylpent-3-en-1-yl)-3,6-dioxatricyclo |
| 3,4,5-trihydroxy-6-{{5-hydroxy-2-[9-hydroxy-5-methyl-5-(4-methylpent-3-en-1-yl)-3,6-dioxatricyclo[5.4.0.0.0.0]und   |
| 3,4,5-trihydroxy-6-{{7-hydroxy-2-[9-hydroxy-5-methyl-5-(4-methylpent-3-en-1-yl)-3,6-dioxatricyclo[5.4.0.0.0.0]und   |
| 6-{{6-(5,7-dihydroxy-4-oxo-3,4-dihydro-2H-1-benzopyran-2-yl)-7-hydroxy-2-methyl-2-(4-methylpent-3-en-1-yl)-2H-c     |
| 6-{{6-(5,7-dihydroxy-4-oxo-3,4-dihydro-2H-1-benzopyran-2-yl)-8-hydroxy-2-methyl-2-(4-methylpent-3-en-1-yl)-2H-c     |
| 6-{{2-[7,8-dihydroxy-2-methyl-2-(4-methylpent-3-en-1-yl)-2H-chromen-6-yl]-5-hydroxy-4-oxo-3,4-dihydro-2H-1-ben      |
| 6-{{2-[7,8-dihydroxy-2-methyl-2-(4-methylpent-3-en-1-yl)-2H-chromen-6-yl]-7-hydroxy-4-oxo-3,4-dihydro-2H-1-ben      |
| 6-{{6-(5,7-dihydroxy-4-oxo-3,4-dihydro-2H-1-benzopyran-2-yl)-7-hydroxy-2-methyl-2-(4-methylpent-3-en-1-yl)-2H-c     |
| 6-{{6-(5,7-dihydroxy-4-oxo-3,4-dihydro-2H-1-benzopyran-2-yl)-5-hydroxy-2-methyl-2-(4-methylpent-3-en-1-yl)-2H-c     |
| 6-{{2-[5,7-dihydroxy-2-methyl-2-(4-methylpent-3-en-1-yl)-2H-chromen-6-yl]-5-hydroxy-4-oxo-3,4-dihydro-2H-1-ben      |
| 6-{{2-[5,7-dihydroxy-2-methyl-2-(4-methylpent-3-en-1-yl)-2H-chromen-6-yl]-7-hydroxy-4-oxo-3,4-dihydro-2H-1-ben      |
| Phaeophorbide b                                                                                                     |
| 5-Hydroxy-7,3',4'-trimethoxy-8-methylisoflavone 5-neohesperidoside                                                  |
| Egonol gentiobioside                                                                                                |
| 5-Hydroxy-7,3',4'-trimethoxy-8-methylisoflavone 5-neohesperidoside                                                  |
| Egonol gentiobioside                                                                                                |
| Leukotriene A4                                                                                                      |
| 5-HEPE                                                                                                              |
| Oxymesterone                                                                                                        |
| 12-HEPE                                                                                                             |
| 14,15-EpETE                                                                                                         |
| 15-HEPE                                                                                                             |
| 15-KETE                                                                                                             |
| 17,18-EpETE                                                                                                         |
| 5-KETE                                                                                                              |
| 11R-HEPE                                                                                                            |
| 18R-HEPE                                                                                                            |
| 12-KETE                                                                                                             |
| Methyl [8]-Shogaol                                                                                                  |
| (ent-7alpha)-7-Hydroxy-8(14),15-pimaradien-19-oic acid                                                              |
| Galanal A                                                                                                           |
| Ineketone                                                                                                           |
| Steviol                                                                                                             |

















|                                                                                                                                               |
|-----------------------------------------------------------------------------------------------------------------------------------------------|
| 6-({2-[5,7-dihydroxy-2-methyl-2-(4-methylpent-3-en-1-yl)-2H-chromen-6-yl]-5-hydroxy-4-oxo-3,4-dihydro-2H-1-benzofuran-3-yl}oxy)propanoic acid |
| 6-({2-[5,7-dihydroxy-2-methyl-2-(4-methylpent-3-en-1-yl)-2H-chromen-6-yl]-7-hydroxy-4-oxo-3,4-dihydro-2H-1-benzofuran-3-yl}oxy)propanoic acid |
| Enalapril                                                                                                                                     |
| Remifentanyl                                                                                                                                  |
| Raloxifene                                                                                                                                    |

| m/z           | Retention time (min) |
|---------------|----------------------|
|               |                      |
| 5.101.826.561 | 3.181.826.667        |
| 5.101.826.561 | 3.181.826.667        |
| 5.101.826.561 | 3.181.826.667        |
| 5.101.826.561 | 3.181.826.667        |
| 5.101.826.561 | 3.181.826.667        |
| 5.101.826.561 | 3.181.826.667        |
| 5.101.826.561 | 3.181.826.667        |
| 5.101.826.561 | 3.181.826.667        |
| 4.370.683.986 | 7.829.883.333        |
| 4.370.683.986 | 7.829.883.333        |
| 4.370.683.986 | 7.829.883.333        |
| 4.370.683.986 | 7.829.883.333        |
| 4.370.683.986 | 7.829.883.333        |
| 4.370.683.986 | 7.829.883.333        |
| 4.370.683.986 | 7.829.883.333        |
| 4.370.683.986 | 7.829.883.333        |
| 4.370.683.986 | 7.829.883.333        |
| 4.370.683.986 | 7.829.883.333        |
| 4.370.683.986 | 7.829.883.333        |
| 643.229.098   | 4.278.953.333        |
| 643.229.098   | 4.278.953.333        |
| 643.229.098   | 4.278.953.333        |
| 3.411.981.874 | 3.803.535            |
| 3.411.981.874 | 3.803.535            |
| 643.229.098   | 4.278.953.333        |
| 643.229.098   | 4.278.953.333        |
| 643.229.098   | 4.278.953.333        |
| 3.411.981.874 | 3.803.535            |
| 3.411.981.874 | 3.803.535            |
| 6.152.230.062 | 3.899.876.667        |
| 6.152.230.062 | 3.899.876.667        |
| 6.152.230.062 | 3.899.876.667        |
| 6.152.230.062 | 3.899.876.667        |
| 3.411.981.874 | 3.803.535            |
| 3.411.981.874 | 3.803.535            |
| 3.411.981.874 | 3.803.535            |
| 3.411.981.874 | 3.803.535            |
| 1.180.890.398 | 232.965              |
| 1.180.890.398 | 232.965              |
| 1.180.890.398 | 232.965              |
| 1.180.890.398 | 232.965              |
| 1.180.890.398 | 232.965              |
| 1.180.890.398 | 232.965              |
| 1.180.890.398 | 232.965              |
| 1.180.890.398 | 232.965              |
| 1.180.890.398 | 232.965              |
| 1.180.890.398 | 232.965              |
| 4.821.732.969 | 2.838.971.667        |
| 5.101.826.561 | 3.181.826.667        |

|               |               |
|---------------|---------------|
| 5.101.826.561 | 3.181.826.667 |
| 5.101.826.561 | 3.181.826.667 |
| 4.902.726.351 | 3.903.501.667 |
| 4.902.726.351 | 3.903.501.667 |
| 4.902.726.351 | 3.903.501.667 |
| 4.902.726.351 | 3.903.501.667 |
| 643.229.098   | 4.278.953.333 |
| 643.229.098   | 4.278.953.333 |
| 643.229.098   | 4.278.953.333 |
| 4.961.463.417 | 275.346       |
| 643.229.098   | 4.278.953.333 |
| 643.229.098   | 4.278.953.333 |
| 643.229.098   | 4.278.953.333 |
| 4.961.463.417 | 275.346       |
| 5.101.826.561 | 3.181.826.667 |
| 5.101.826.561 | 3.181.826.667 |
| 5.101.826.561 | 3.181.826.667 |
| 5.101.826.561 | 3.181.826.667 |
| 4.821.732.969 | 2.838.971.667 |
| 3.411.981.874 | 3.803.535     |
| 3.411.981.874 | 3.803.535     |
| 752.160.809   | 4.371.788.333 |
| 6.292.281.511 | 4.074.456.667 |
| 6.152.185.516 | 389.353       |
| 6.152.185.516 | 389.353       |
| 7.791.615.171 | 4.444.833.333 |
| 7.791.615.171 | 4.444.833.333 |
| 7.791.615.171 | 4.444.833.333 |
| 7.791.615.171 | 4.444.833.333 |
| 7.791.615.171 | 4.444.833.333 |
| 7.791.615.171 | 4.444.833.333 |
| 7.791.615.171 | 4.444.833.333 |
| 7.791.615.171 | 4.444.833.333 |
| 7.791.615.171 | 4.444.833.333 |
| 7.791.615.171 | 4.444.833.333 |
| 7.791.615.171 | 4.444.833.333 |
| 7.791.615.171 | 4.444.833.333 |
| 7.791.615.171 | 4.444.833.333 |
| 7.791.615.171 | 4.444.833.333 |
| 7.791.615.171 | 4.444.833.333 |
| 4.370.683.986 | 7.829.883.333 |
| 6.152.606.563 | 3.904.408.333 |
| 6.152.606.563 | 3.904.408.333 |
| 6.152.606.563 | 3.904.408.333 |
| 4.370.683.986 | 7.829.883.333 |
| 6.152.606.563 | 3.904.408.333 |
| 6.152.606.563 | 3.904.408.333 |
| 6.152.606.563 | 3.904.408.333 |
| 5.382.029.403 | 3.538.141.667 |
| 6.292.269.961 | 4.066.476.667 |
| 6.292.269.961 | 4.066.476.667 |
| 752.160.809   | 4.371.788.333 |

|               |               |
|---------------|---------------|
| 752.160.809   | 4.371.788.333 |
| 752.160.809   | 4.371.788.333 |
| 752.160.809   | 4.371.788.333 |
| 752.160.809   | 4.371.788.333 |
| 752.160.809   | 4.371.788.333 |
| 752.160.809   | 4.371.788.333 |
| 752.160.809   | 4.371.788.333 |
| 752.160.809   | 4.371.788.333 |
| 752.160.809   | 4.371.788.333 |
| 752.160.809   | 4.371.788.333 |
| 6.292.281.511 | 4.074.456.667 |
| 3.411.981.874 | 3.803.535     |
| 3.411.981.874 | 3.803.535     |
| 1.560.198.923 | 0.286783333   |
| 6.292.281.511 | 4.074.456.667 |
| 7.791.615.171 | 4.444.833.333 |
| 4.961.463.417 | 275.346       |
| 4.961.463.417 | 275.346       |
| 4.961.463.417 | 275.346       |
| 4.961.463.417 | 275.346       |
| 7.791.615.171 | 4.444.833.333 |
| 4.961.463.417 | 275.346       |
| 6.162.240.845 | 3.898.061.667 |
| 3.411.981.874 | 3.803.535     |
| 4.961.463.417 | 275.346       |
| 4.961.463.417 | 275.346       |
| 4.961.463.417 | 275.346       |
| 4.961.463.417 | 275.346       |
| 566.211.328   | 392.778       |
| 1.560.198.923 | 0.286783333   |
| 1.560.198.923 | 0.286783333   |
| 1.560.198.923 | 0.286783333   |
| 1.560.198.923 | 0.286783333   |
| 1.560.198.923 | 0.286783333   |
| 566.211.328   | 392.778       |
| 4.821.732.969 | 2.838.971.667 |
| 1.400.572.152 | 0.277583333   |
| 1.400.572.152 | 0.277583333   |
| 1.400.572.152 | 0.277583333   |
| 1.400.572.152 | 0.277583333   |
| 4.821.732.969 | 2.838.971.667 |
| 1.400.572.152 | 0.277583333   |
| 1.400.572.152 | 0.277583333   |
| 1.400.572.152 | 0.277583333   |
| 1.400.572.152 | 0.277583333   |
| 5.382.029.403 | 3.538.141.667 |
| 5.382.029.403 | 3.538.141.667 |
| 6.432.386.512 | 4.300.743.333 |
| 6.432.386.512 | 4.300.743.333 |























|               |           |
|---------------|-----------|
| 6.152.185.516 | 389.353   |
| 6.152.185.516 | 389.353   |
| 3.411.981.874 | 3.803.535 |
| 3.411.981.874 | 3.803.535 |
| 4.961.463.417 | 275.346   |
